# Supplementary material for: Profiling of branched-chain fatty acids via nitroxide radical-directed dissociation integrated on an LC-MS/MS workflow
Source: Royal Society of Chemistry journal article supplement (doi:10.1039/d2an00266c), 2022-01-01
Supplement: d2an00266c1.pdf [file d2an00266c1.pdf]

## Supporting Information

### **Profiling of Branched-Chain Fatty Acids via Nitroxide Radical-Directed Dissociation Integrated on an LC-MS/MS Workflow**

Ruijun Jian<sup>a</sup>, Xue Zhao<sup>a</sup>, Qiaohong Lin<sup>a</sup>, Yu Xia<sup>\*,a</sup>

<sup>a</sup>MOE Key Laboratory of Bioorganic Phosphorus Chemistry & Chemical Biological,  
Department of Chemistry, Tsinghua University, Beijing 100084, China

#### **Corresponding Author Information:**

E-mail: xiayu@mail.tsinghua.edu.cn

ORCID

Yu Xia: 0000-0001-8694-9900

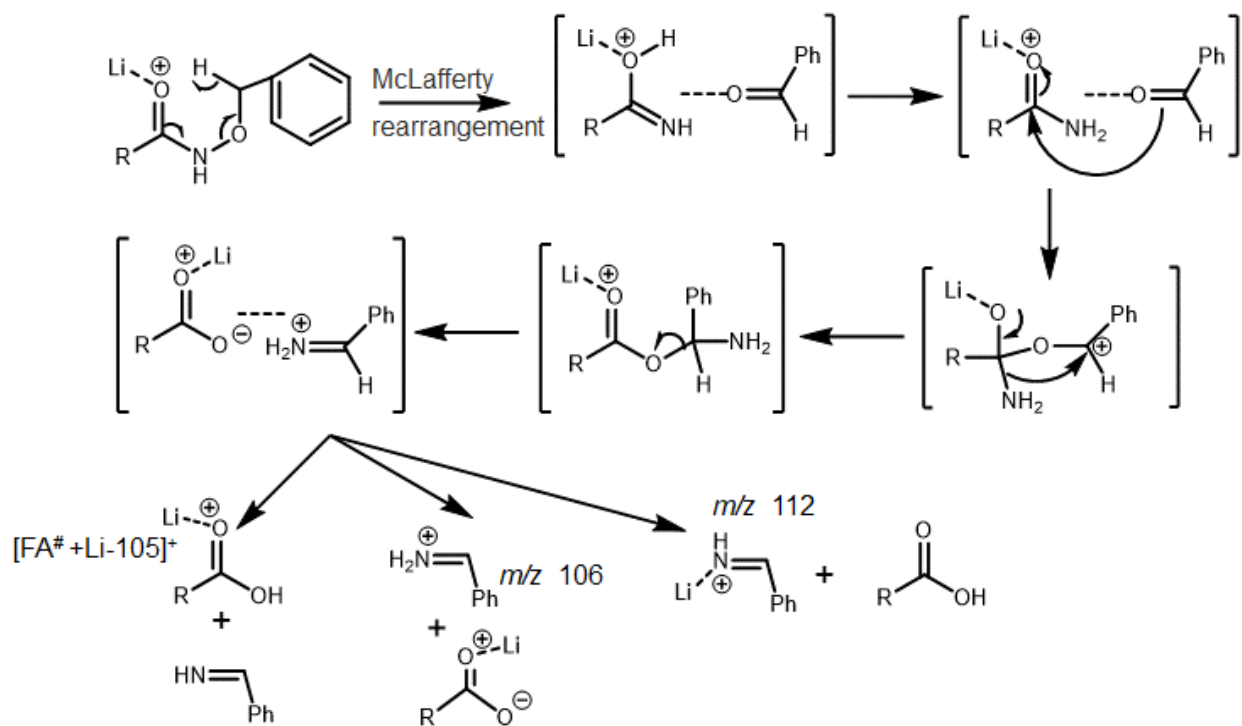

**Scheme S1.** Proposed fragmentation pathways for N-O rearrangement during CID of  $[M^{\#} + Li]^+$ .

“#” stands for O-BHA modification of FA.

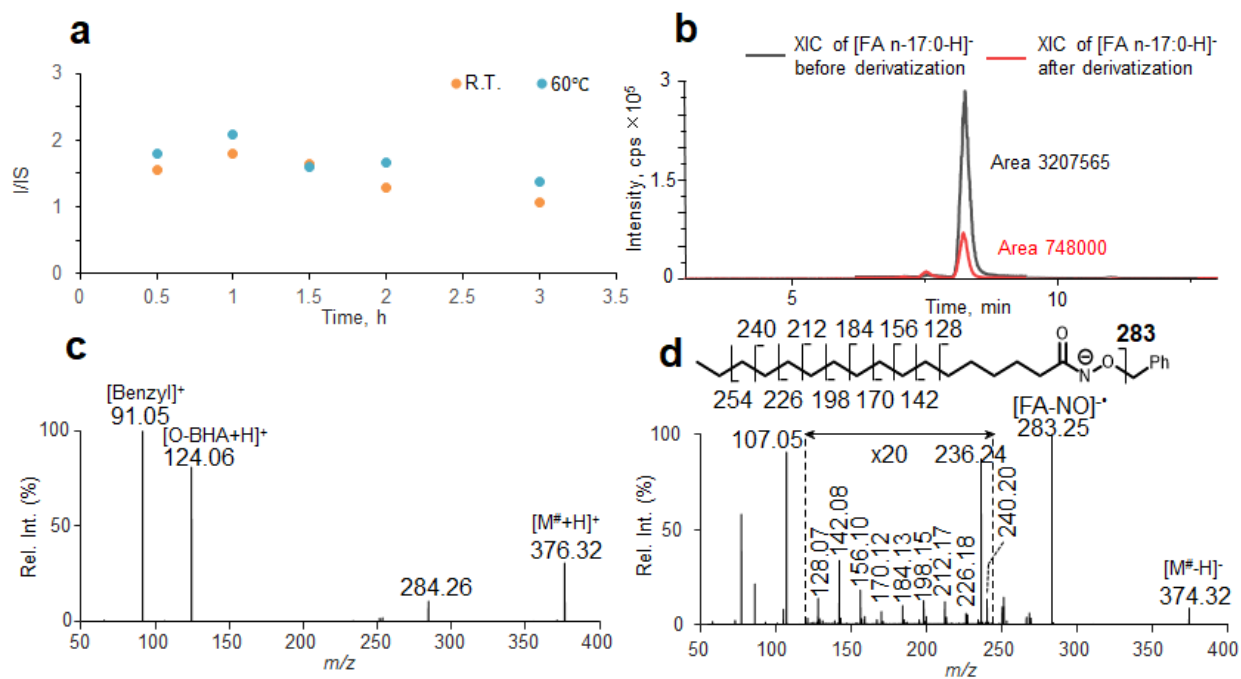

**Figure S1.** (a) Intensity ratio of FA n-17:0 ( $[M^{\#} + H]^+$ ,  $m/z$  376, 10  $\mu$ M) over the internal standard ( $m/z$  394, 5  $\mu$ M) as a function of reaction time. FA 18:0-d<sub>4</sub> derivatized by O-BHA at 60°C for 1h was added as the internal standard at the end of FA n-17:0 derivatization. (b) XICs of  $[M-H]^-$  ( $m/z$  269) of FA n-17:0 before and after 1h reaction at 60°C. (c) MS<sup>2</sup> CID of FA n-17:0 ( $[M^{\#} + H]^+$ ,  $m/z$  376). (d) MS<sup>2</sup> CID of FA n-17:0 ( $[M^{\#} - H]^-$ ,  $m/z$  374) collected on QTOF mass spectrometer.

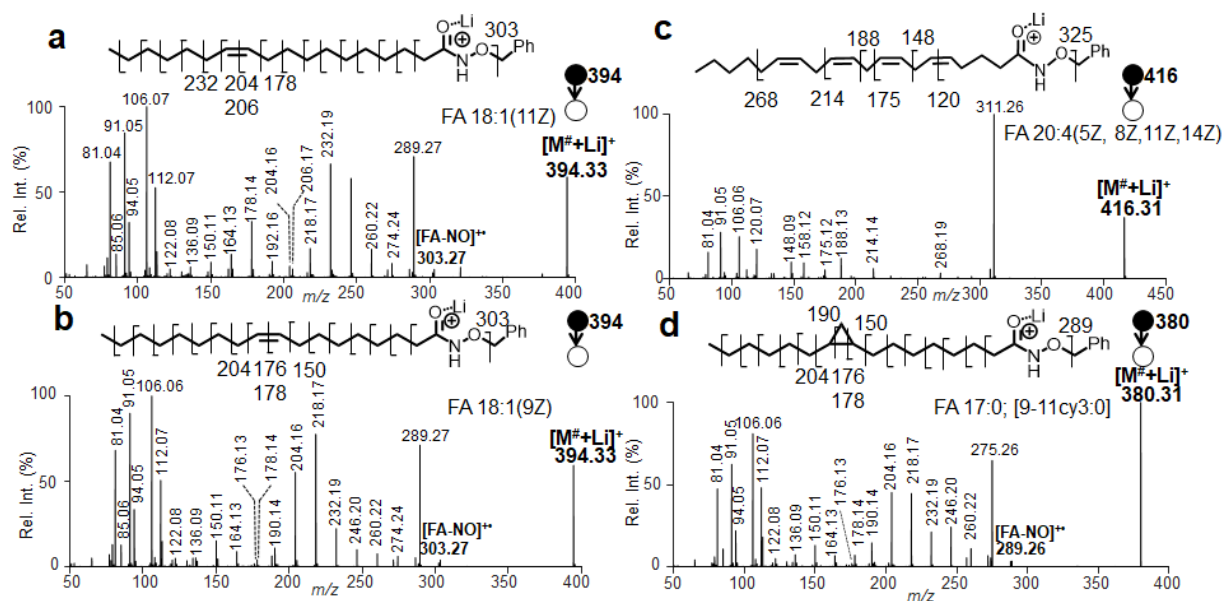

**Figure S2.** Analysis of monounsaturated and cyclopropane FAs via nitroxide-RDD. MS<sup>2</sup> CID of  $[M^{\#} + Li]^+$ , the lithium adduct ions of O-BHA derivatized (a) FA 18:1 (11Z) ( $m/z$  394), (b) FA 18:1 (9Z) ( $m/z$  394), (c) FA 18:1 (5Z, 8Z, 11Z, 14Z) ( $m/z$  416) and (d) FA 17:0; [9-11cy3:0] ( $m/z$  380) collected on a QTOF mass spectrometer.

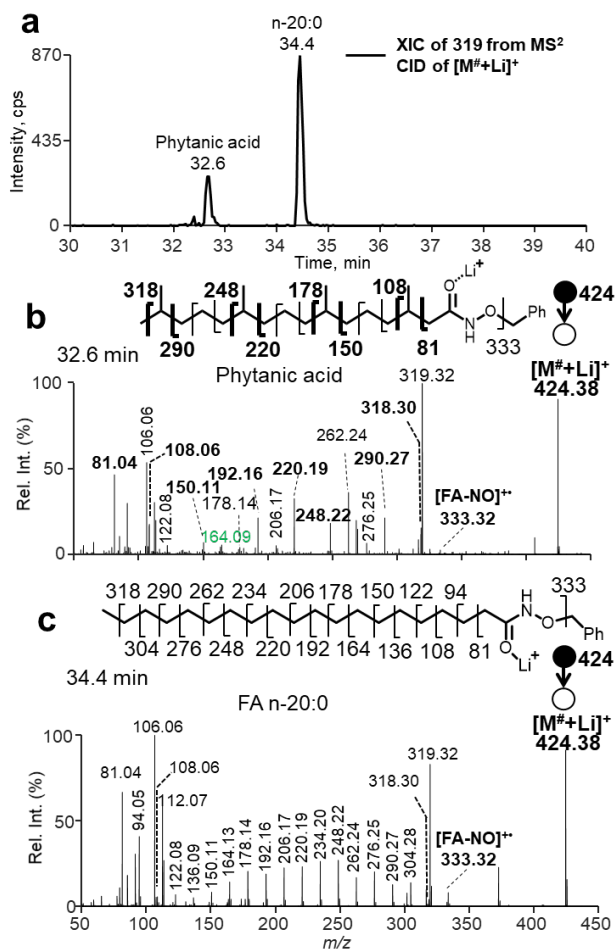

**Figure S3.** Identification of FA 20:0 isomers in yak milk powder. (a) XIC of  $m/z$  319 from MS<sup>2</sup> CID of [M<sup>#</sup>+Li]<sup>+</sup>. MS<sup>2</sup> CID spectra of FA 20:0 ([M<sup>#</sup>+Li]<sup>+</sup>,  $m/z$  424) from peaks eluted at (b) 32.6 min (phytanic acid) and (c) 34.4 min (FA n-20:0) collected on a QTOF mass spectrometer.

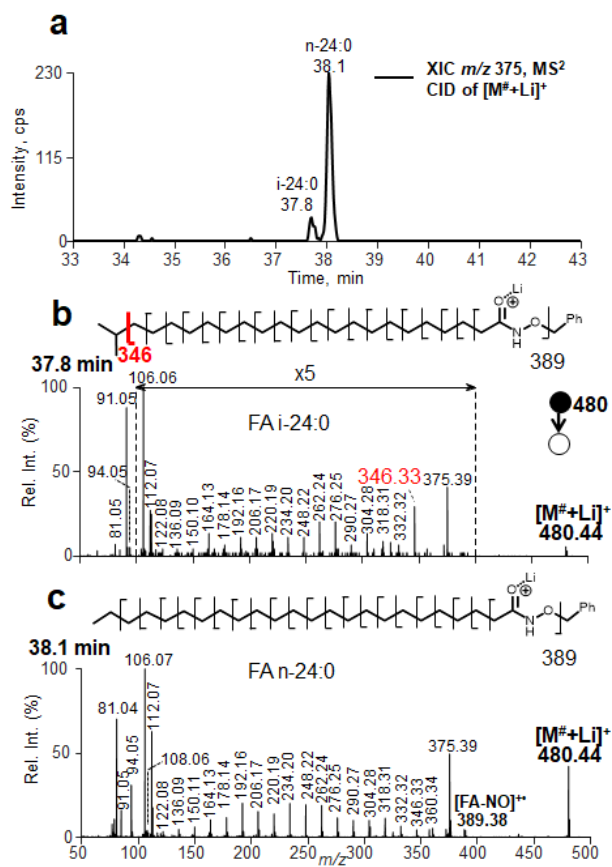

**Figure S4.** Identification of FA 24:0 isomers in human plasma. (a) XIC of the FA 24:0 isomers ( $m/z$  375 from MS<sup>2</sup> CID of  $[M^{\#}+Li]^+$ ). MS<sup>2</sup> CID spectra of  $[M^{\#}+Li]^+$  ( $m/z$  480) from peaks eluted at (b) 37.8 min (FA i-24:0) and (c) 38.1 min (FA n-24:0).

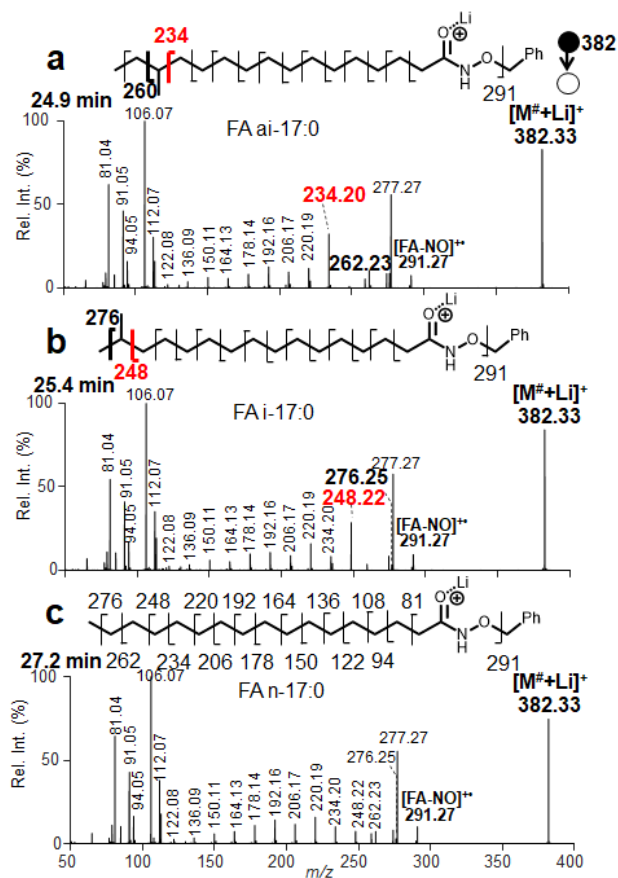

**Figure S5.** Identification of FA 17:0 isomers in human plasma. MS<sup>2</sup> CID spectra of [M<sup>#</sup>+Li]<sup>+</sup> (*m/z* 382) from peaks eluted at (a) 24.9 min (FA ai-17:0), (b) 25.4 min (FA i-17:0) and (c) 27.2 min (n-17:0) collected on a QTOF mass spectrometer.

**LC Method(All flow rate: 0.300 mL/min)**

**Method 1 (For standard mixture)**

**Table S1.** LC Method 1 Gradient

| Time (minute) | Mobile phase B (%) |
|---------------|--------------------|
| 0.0           | 30                 |
| 2.0           | 30                 |
| 8.0           | 45                 |
| 24.5          | 45                 |
| 31.5          | 95                 |
| 34.0          | 95                 |
| 34.5          | 30                 |
| 37.0          | 30                 |

**Method 2 (For biological sample)**

**Table S2.** LC Method 2 Gradient

| Time (minute) | Mobile phase B (%) |
|---------------|--------------------|
| 0.0           | 30                 |
| 2.0           | 30                 |
| 8.0           | 45                 |
| 24.5          | 45                 |
| 31.5          | 95                 |
| 41.5          | 95                 |
| 42.0          | 100                |
| 46.5          | 100                |
| 47.0          | 30                 |
| 50.0          | 30                 |

**Table S3.** Accurate mass measurement of fragment ions generated from MS<sup>2</sup> CID of FA n-17:0 ([M<sup>#</sup>+Li]<sup>+</sup>) on a QTOF mass spectrometer.

| <b>Molecular formula</b>                                       | <b>Theoretical <i>m/z</i></b> | <b>Measured <i>m/z</i></b> | <b>Error (ppm)</b> |
|----------------------------------------------------------------|-------------------------------|----------------------------|--------------------|
| C <sub>24</sub> H <sub>41</sub> LiNO <sub>2</sub> <sup>+</sup> | 382.3292                      | 382.3292                   | 0                  |
| C <sub>17</sub> H <sub>34</sub> LiNO <sub>2</sub> <sup>+</sup> | 291.2744                      | 291.2746                   | +0.7               |
| C <sub>17</sub> H <sub>34</sub> LiO <sub>2</sub> <sup>+</sup>  | 277.2713                      | 277.2713                   | 0                  |
| C <sub>16</sub> H <sub>31</sub> LiNO <sub>2</sub> <sup>+</sup> | 276.2509                      | 276.2513                   | +1.3               |
| C <sub>17</sub> H <sub>33</sub> LiNO <sup>+</sup>              | 274.2717                      | 274.2717                   | +1.0               |
| C <sub>15</sub> H <sub>29</sub> LiNO <sub>2</sub> <sup>+</sup> | 262.2353                      | 262.2353                   | 0                  |
| C <sub>17</sub> H <sub>32</sub> LiO <sup>+</sup>               | 259.2608                      | 259.2610                   | +0.8               |
| C <sub>14</sub> H <sub>27</sub> LiNO <sub>2</sub> <sup>+</sup> | 248.2196                      | 248.2198                   | +0.7               |
| C <sub>13</sub> H <sub>25</sub> LiNO <sub>2</sub> <sup>+</sup> | 234.2040                      | 234.2041                   | +1.3               |
| C <sub>12</sub> H <sub>23</sub> LiNO <sub>2</sub> <sup>+</sup> | 220.1883                      | 220.1884                   | +0.4               |
| C <sub>11</sub> H <sub>21</sub> LiNO <sub>2</sub> <sup>+</sup> | 206.1727                      | 206.1730                   | +1.5               |
| C <sub>10</sub> H <sub>19</sub> LiNO <sub>2</sub> <sup>+</sup> | 192.1570                      | 192.1571                   | +0.5               |
| C <sub>9</sub> H <sub>17</sub> LiNO <sub>2</sub> <sup>+</sup>  | 178.1414                      | 178.1414                   | 0                  |
| C <sub>8</sub> H <sub>15</sub> LiNO <sub>2</sub> <sup>+</sup>  | 164.1257                      | 164.1255                   | -1.2               |
| C <sub>7</sub> H <sub>13</sub> LiNO <sub>2</sub> <sup>+</sup>  | 150.1101                      | 150.1100                   | 0                  |
| C <sub>6</sub> H <sub>11</sub> LiNO <sub>2</sub> <sup>+</sup>  | 136.0944                      | 136.0944                   | 0                  |
| C <sub>5</sub> H <sub>9</sub> LiNO <sub>2</sub> <sup>+</sup>   | 122.0788                      | 122.0787                   | 0                  |
| C <sub>7</sub> H <sub>8</sub> LiN <sup>+</sup>                 | 113.0811                      | 113.0811                   | -0.3               |
| C <sub>7</sub> H <sub>7</sub> LiN <sup>+</sup>                 | 112.0733                      | 112.0733                   | -0.8               |
| C <sub>4</sub> H <sub>7</sub> LiNO <sub>2</sub> <sup>+</sup>   | 108.0631                      | 108.0630                   | -1.2               |
| C <sub>7</sub> H <sub>8</sub> N <sup>+</sup>                   | 106.0651                      | 106.0652                   | +0.7               |
| C <sub>3</sub> H <sub>5</sub> LiNO <sub>2</sub> <sup>+</sup>   | 94.0475                       | 94.0473                    | -2.1               |
| C <sub>7</sub> H <sub>7</sub> <sup>+</sup>                     | 91.0542                       | 91.0543                    | +0.8               |
| C <sub>6</sub> H <sub>6</sub> Li <sup>+</sup>                  | 85.0624                       | 85.0623                    | -1.1               |
| C <sub>2</sub> H <sub>4</sub> LiNO <sub>2</sub> <sup>+</sup>   | 81.0397                       | 81.0395                    | -2.5               |



**Table S4.** A list of identified saturated FAs from yak milk powder.

| Sum composition | $[M^{#+H}]^+$ ,<br><i>m/z</i> | Rel. Composition (%)  | $[M^{#+Li}]^+$ ,<br><i>m/z</i> | Retention time,<br>min |
|-----------------|-------------------------------|-----------------------|--------------------------------|------------------------|
| FA 6:0          | 222                           | n-6:0 (100%)          | 228.1571                       | 2.6                    |
| FA 7:0          | 236                           | n-7:0 (100%)          | 242.1727                       | 3.0                    |
| FA 8:0          | 250                           | n-8:0 (100%)          | 256.1884                       | 3.4                    |
| FA 9:0          | 264                           | n-9:0 (100%)          | 270.204                        | 4.1                    |
| FA 10:0         | 278                           | n-10:0 (100%)         | 284.2196                       | 5.1                    |
| FA 11:0         | 292                           | n-11:0 (100%)         | 298.2353                       | 6.6                    |
| FA 12:0         | 306                           | n-12:0 (100%)         | 312.2509                       | 8.4                    |
| FA 13:0         | 320                           | ai-13:0 (6.6%)        | 326.2666                       | 9.8                    |
|                 |                               | i-13:0 (19.2%)        |                                | 10.0                   |
|                 |                               | n-13:0 (74.2%)        |                                | 10.5                   |
| FA 14:0         | 334                           | i-14:0 (2.1%)         | 340.2822                       | 12.4                   |
|                 |                               | n-14:0 (97.9%)        |                                | 13.4                   |
| FA 15:0         | 348                           | ai-15:0 (36.0%)       | 354.2979                       | 15.2                   |
|                 |                               | i-15:0 (15.9%)        |                                | 15.6                   |
|                 |                               | n-15:0 (48.1%)        |                                | 16.5                   |
| FA 16:0         | 362                           | i-16:0 (1.7%)         | 368.3135                       | 19.9                   |
|                 |                               | n-16:0 (98.3%)        |                                | 21.1                   |
| FA 17:0         | 376                           | ai-17:0 (31.9%)       | 382.3292                       | 25.4                   |
|                 |                               | i-17:0 (22.3%)        |                                | 26                     |
|                 |                               | n-17:0 (46.8%)        |                                | 27.8                   |
| FA 18:0         | 390                           | i-18:0 (0.5 %)        | 396.3448                       | 31.0                   |
|                 |                               | n-18:0 (99.5%)        |                                | 31.6                   |
| FA 19:0         | 404                           | n-19:0 (100%)         | 410.3605                       | 33.3                   |
| FA 20:0         | 418                           | Phytanic acid (29.1%) | 424.3762                       | 32.5                   |
|                 |                               | n-20:0 (70.9%)        |                                | 34.4                   |
| FA 21:0         | 432                           | n-21:0 (100%)         | 438.3918                       | 35.3                   |
| FA 22:0         | 446                           | n-22:0 (100%)         | 452.4075                       | 36.1                   |
| FA 23:0         | 460                           | n-23:0 (100%)         | 466.4231                       | 37.1                   |
| FA 24:0         | 474                           | n-24:0 (100%)         | 480.4388                       | 38.2                   |

## Analysis of total fatty acids in pooled human plasma

**Table S5.** A list of identified saturated fatty acids from pooled human plasma.

| Sum composition | [M <sup>#</sup> +H] <sup>+</sup> ,<br>m/z | Rel. Composition (%) | [M <sup>#</sup> +Li] <sup>+</sup> ,<br>m/z | Retention time,<br>min |
|-----------------|-------------------------------------------|----------------------|--------------------------------------------|------------------------|
| FA 6:0          | 222                                       | n-6:0 (100%)         | 228.1571                                   | 2.6                    |
| FA 7:0          | 236                                       | n-7:0 (100%)         | 242.1727                                   | 3.0                    |
| FA 8:0          | 250                                       | n-8:0 (100%)         | 256.1884                                   | 3.4                    |
| FA 9:0          | 264                                       | n-9:0 (100%)         | 270.204                                    | 4.1                    |
| FA 10:0         | 278                                       | n-10:0 (100%)        | 284.2196                                   | 5.1                    |
| FA 12:0         | 306                                       | n-12:0 (100%)        | 312.2509                                   | 8.4                    |
| FA 13:0         | 320                                       | ai-13:0 (25.2%)      | 326.2666                                   | 9.8                    |
|                 |                                           | i-13:0 (9.7%)        |                                            | 10.0                   |
|                 |                                           | n-13:0 (65.1%)       |                                            | 10.5                   |
| FA 14:0         | 334                                       | i-14:0 (1.9%)        | 340.2822                                   | 12.4                   |
|                 |                                           | n-14:0 (98.1%)       |                                            | 13.4                   |
| FA 15:0         | 348                                       | ai-15:0 (28.4%)      | 354.2979                                   | 15.1                   |
|                 |                                           | i-15:0 (9.4%)        |                                            | 15.4                   |
|                 |                                           | n-15:0 (62.2%)       |                                            | 16.3                   |
| FA 16:0         | 362                                       | i-16:0 (0.3%)        | 368.3135                                   | 19.4                   |
|                 |                                           | n-16:0 (99.7%)       |                                            | 20.6                   |
| FA 17:0         | 376                                       | n-5 (4.7%)           | 382.3292                                   | 24.3                   |
|                 |                                           | ai-17:0 (16.5%)      |                                            | 24.9                   |
|                 |                                           | i-17:0 (14.0%)       |                                            | 25.4                   |
|                 |                                           | n-17:0 (64.7%)       |                                            | 27.2                   |
| FA 18:0         | 390                                       | i-18:0 (0.1 %)       | 396.3448                                   | 30.7                   |
|                 |                                           | n-18:0 (99.9%)       |                                            | 31.4                   |
| FA 19:0         | 404                                       | n-19:0 (100%)        | 410.3605                                   | 33.2                   |
| FA 20:0         | 418                                       | n-20:0 (100%)        | 424.3762                                   | 34.3                   |
| FA 21:0         | 432                                       | n-21:0 (100%)        | 438.3918                                   | 35.3                   |
| FA 22:0         | 446                                       | n-22:0 (100%)        | 452.4075                                   | 36.1                   |
| FA 23:0         | 460                                       | n-23:0 (100%)        | 466.4231                                   | 37.1                   |
| FA 24:0         | 474                                       | i-24:0 (10.3%)       | 480.4388                                   | 37.8                   |
|                 |                                           | n-24:0 (89.7%)       |                                            | 38.1                   |
| FA 26:0         | 502                                       | n-26:0 (100%)        | 508.4701                                   | 40.7                   |
